# Supplementary material for: Bulk-heterojunction photocapacitors with high open-circuit voltage for low light intensity photostimulation of neurons
Source: Royal Society of Chemistry journal article supplement (doi:10.1039/d0tc03477k), 2021-01-01
Supplement: d0tc03477k1.pdf [file d0tc03477k1.pdf]

## Bulk-Heterojunction Photocapacitors with High Open-circuit Voltage for Low Light Intensity Photostimulation of Neurons

*Shashi Bhushan Srivastava, Rustamzhon Melikov, Erdost Yildiz, Ugur Meric Dikbas, Sadra Sadeghi, Ibrahim Halil Kavakli, Afsun Sahin, and Sedat Nizamoglu\**

**Fig. S1** Optical spectrum of blue LED at  $20 \text{ mW}\cdot\text{cm}^{-2}$  with FWHM of 16.7 nm.

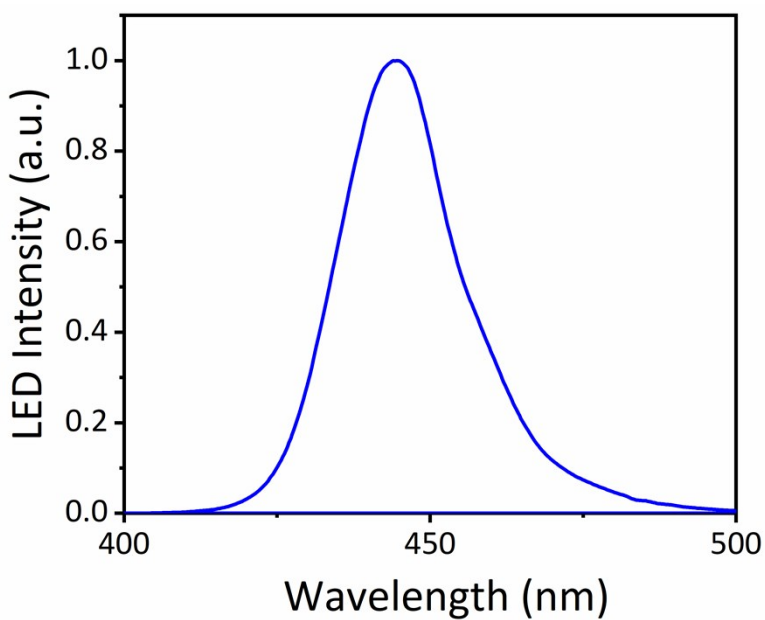

**Fig. S2** The equivalent circuit model for fitting the Nyquist plot of biointerfaces in 3-electrode configuration. (a) Equivalent circuit with physical parameters of the BI-1 biointerface. (b) Equivalent circuit with physical parameters of the BI-2 biointerface.

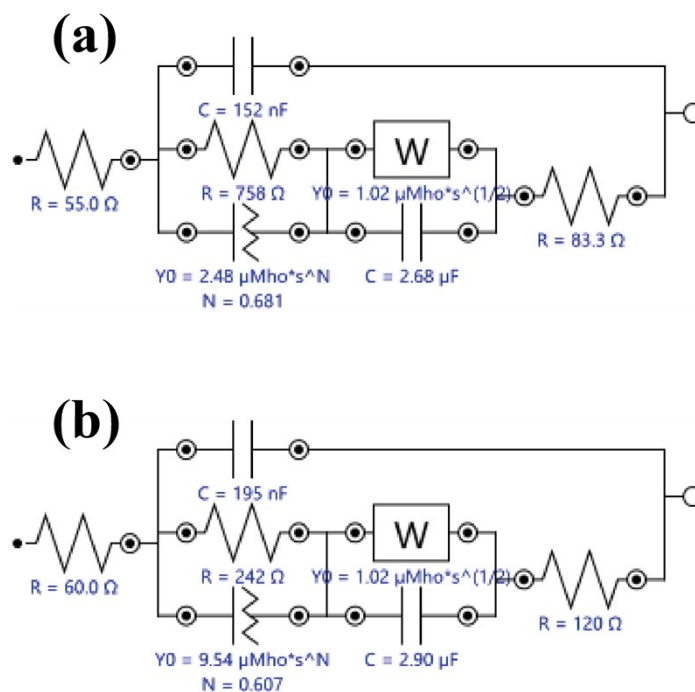

**Fig. S3** Cytotoxicity assessment and immunofluorescence microscopy. (a) The effect of photoelectrodes on the metabolic activity of SH-SY5Y cells were assessed by MTT assay. DMSO samples corresponds to the cytotoxic control samples that are incubated with 10% DMSO. ITO was used positive control and % cell viability was calculated relative to ITO controls. Experiment was repeated for three times (n=3) with at least three technical replicates. Results are presented in a column graph plotting the mean with standard error of the mean. Unpaired two-tailed t-test was performed to determine level of significance; \*p < 0.05 was considered as statistically significant, and nonsignificant differences are presented as “ns”. (b) Morphology of the cells grown on photoelectrodes were visualized by fluorescence microscopy after DAPI staining and anti-beta III tubulin immunolabelling (scale bar = 100  $\mu$ m).

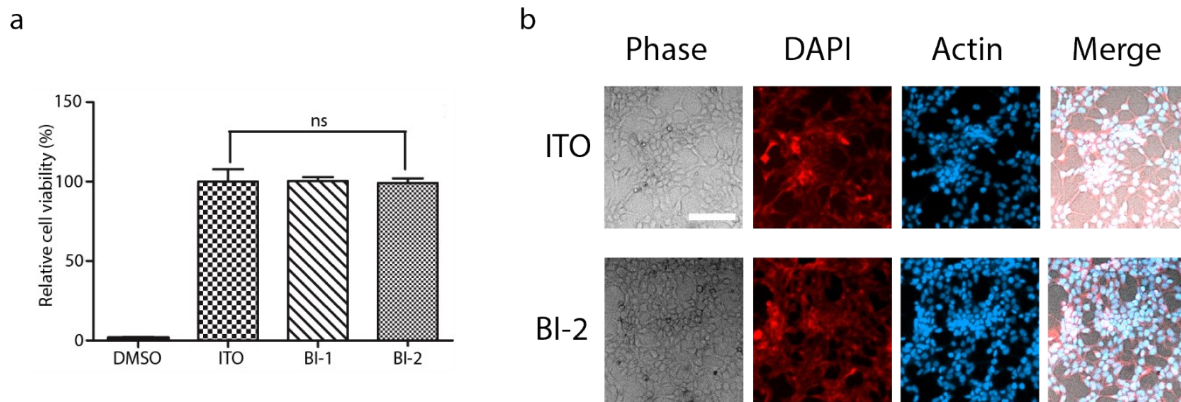

**Fig. S4.** The neural activity of the control group that consists of hippocampal cells cultured on a petri dish. It shows that there is no spontaneous activity as shown on the control substrate

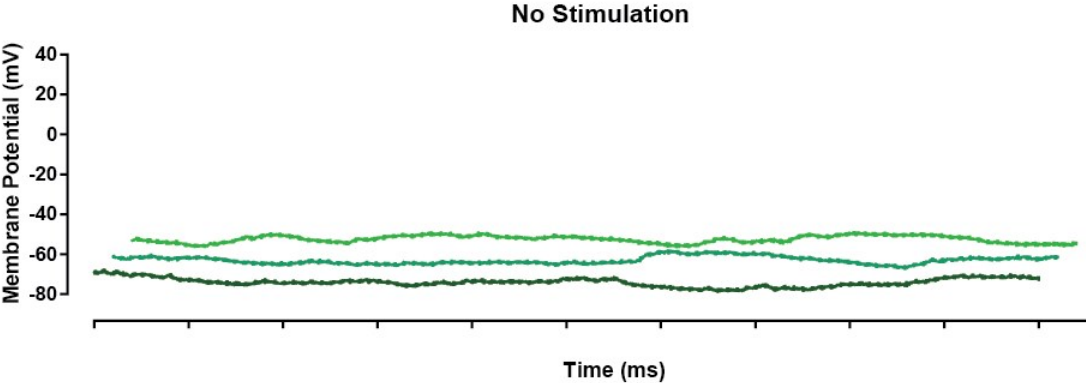

**Fig. S5.** Light evoked action potential response of primary hippocampal neuron during 1/0.1 ms light stimulation of the biointerface.

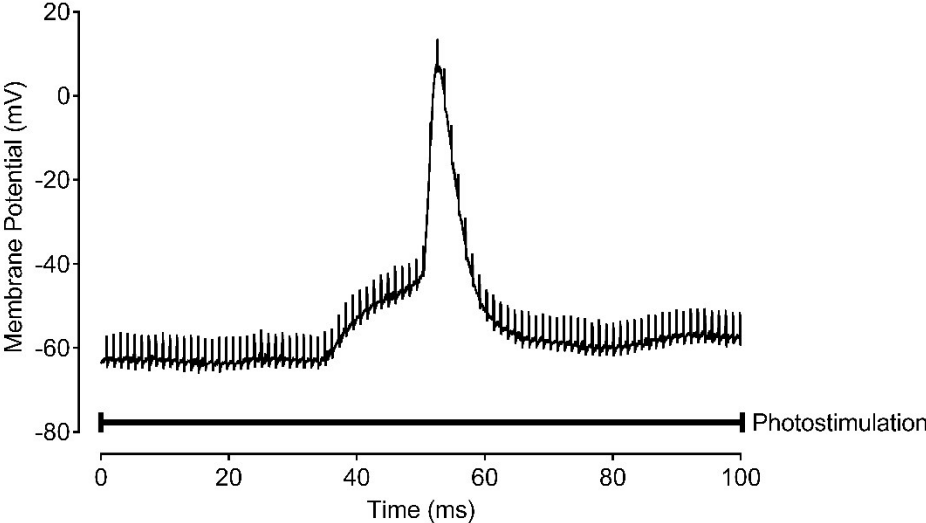

**Fig. S6.** Membrane potential variation of SH-SY5Y cells upon light illumination of 10 ms and 10 mW cm<sup>-2</sup> light pulse. The plots for BI-1 and BI-2 biointerfaces are represented by black and blue lines, respectively.

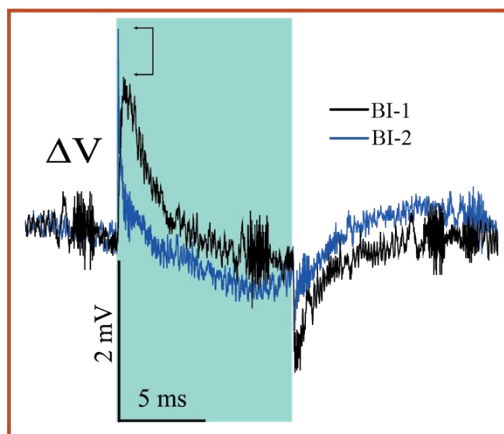

We performed the electrophysiology experiment for both the electrodes using SH-SY5Y cells. An initial depolarization phase is observed both for BI-1 and BI-2 biointerfaces during the turning on the illumination. During the turn-off of the illumination the decrease of the potential in the semiconductor led to a hyperpolarization of membrane potential. In comparison with BI-1, BI-2 having higher open-circuit voltage generated a stronger depolarization of 0.7 mV of cell membrane with faster switching time. It suggests that BI-2 biointerface has better photostimulation than BI-1, which is in-line with the higher and faster photocurrent response.

## Appendix-1: Thermal Effect at Neuron Surface due to Light Illumination

Here we determine the maximum temperature change that can be induced by the biointerface.

For water;

$$dq(\text{rev}, p) = mC_p dT \quad (1)$$

Where,  $d_q$  is related to light energy,  $C_p$  is the molar heat capacity of water,  $m$  is the molar amount of water.

Temperature change of  $dT$  can be calculated from the equation (1).

We use the integral form of the equation and apply experimental parameters as follows

$$\int_0^q dq(\text{rev}, p) = mC_p \int_{295K}^T dT \quad (2)$$

Considering water heat capacity as  $C_p=75.291 \text{ JK}^{-1}\text{mol}^{-1}$ :

$$q = mC_p \Delta T \quad (3)$$

We can calculate the thermal energy ( $q$ ) because of light illumination of  $10 \text{ mW.cm}^{-2}$  (if all the light energy is converted to heat):

$$q = I \times t = 10\text{ms} \times 20\text{mW} = 2 \times 10^{-4} \text{ J} \quad (4)$$

From equations (3) and (4) we obtain the temperature change:

$$2 \times 10^{-4} \text{ J} = (0.0332 \text{ g} / 18 \text{ g} / \text{mol}) \times 75.291 \text{ JK}^{-1} \text{ mol}^{-1} \Delta T \quad (5)$$

$$\Delta T = 0.0007^\circ \text{C}$$

The light induced temperature rise should be below  $1^\circ \text{C}$  (physiological range) as per ocular safety regulation. Therefore, the thermal change of 3-order less than the physiological range is not responsible for the photostimulation of the cells.
